# Supplementary material
Source: PubMed Central journal article supplement (PMC9814547)
Supplement: 41416_2022_2030_MOESM3_ESM.pdf [file 41416_2022_2030_MOESM3_ESM.pdf]

# Targeted exome-based predictors of patterns of progression of colorectal liver metastasis after percutaneous thermal ablation

Statistical Analysis

Iwan Paolucci, PhD\*

07 October 2022

## Contents

|          |                                                               |           |
|----------|---------------------------------------------------------------|-----------|
| <b>1</b> | <b>Setup</b>                                                  | <b>3</b>  |
| <b>2</b> | <b>Prepare Data</b>                                           | <b>4</b>  |
| 2.1      | Download data . . . . .                                       | 4         |
| 2.2      | Load data . . . . .                                           | 4         |
| 2.3      | Filter . . . . .                                              | 4         |
| 2.4      | Preprocess . . . . .                                          | 6         |
| 2.5      | Extract mutations . . . . .                                   | 8         |
| <b>3</b> | <b>Population</b>                                             | <b>10</b> |
| 3.1      | Baseline characteristics . . . . .                            | 10        |
| 3.2      | Baseline survival . . . . .                                   | 11        |
| 3.3      | Overview mutations . . . . .                                  | 13        |
| 3.4      | Type of progression . . . . .                                 | 14        |
| <b>4</b> | <b>Overall survival</b>                                       | <b>15</b> |
| 4.1      | By progression pattern . . . . .                              | 15        |
| <b>5</b> | <b>Intrahepatic progression anywhere</b>                      | <b>19</b> |
| 5.1      | Intrahepatic progression outside the ablation zone . . . . .  | 23        |
| 5.2      | Intrahepatic progression at the ablation zone . . . . .       | 28        |
| <b>6</b> | <b>Salvage LRT</b>                                            | <b>32</b> |
| 6.1      | Survival following IHP . . . . .                              | 35        |
| 6.2      | Survival after IHP - salvage LRT vs. no salvage LRT . . . . . | 36        |

---

\*Department of Interventional Radiology, The University of Texas MD Anderson Cancer Center, Houston, TX, USA

|          |                                                                 |           |
|----------|-----------------------------------------------------------------|-----------|
| <b>7</b> | <b>Frequency of mutations</b>                                   | <b>39</b> |
| 7.1      | Number of mutations per pathway with predominant gene . . . . . | 39        |
| 7.2      | Number of mutations per pathway . . . . .                       | 42        |
| 7.3      | Frequency of mutations . . . . .                                | 43        |
| 7.4      | Mutation per race/ethnicity . . . . .                           | 43        |
| <b>8</b> | <b>Citation</b>                                                 | <b>45</b> |

# 1 Setup

```
library(tidyverse)
library(config)
library(readr)
library(dplyr)
library(survival)
library(survminer)
library(stringr)
library(parameters)
library(Rfast)
library(ggpubr)
library(tidyr)
library(forestmodel)
library(ggsci)
library(data.table)
library(gtsummary)
library(gt)
source("R/write_params_to_csv.cox.R")
source("R/finegray_model.R")
options(scipen = 999, digits = 3)
```

## 2 Prepare Data

### 2.1 Download data

Download data from RedCAP API. Code omitted.

### 2.2 Load data

```
data_raw <- read_csv("data/data.csv")
```

### 2.3 Filter

Remove excluded cases.

```
data <- data_raw %>% filter(date_of_ablation >= "2011-01-01" & !(exclude_reason %in% c(6, 9)))
```

226 patients with initial CLM ablation between 01/01/2011 - 03/30/2022.

```
data %>% select(exclude_reason) %>%  
  mutate(exclude_reason = factor(exclude_reason,  
                                labels =  
                                c("< 1 Year imaging follow-up",  
                                  "Non-thermal ablation modality (e.g. IRE, Cryo)",  
                                  "Genomic mutation profile missing",  
                                  "< 46 genes tested",  
                                  "Combination with Surgery, TACE or other LRT"))) %>%  
  tbl_summary(label = list(exclude_reason = 'Reason for exclusion'))
```

| Characteristic                                 | N = 226  |
|------------------------------------------------|----------|
| Reason for exclusion                           |          |
| < 1 Year imaging follow-up                     | 23 (29%) |
| Non-thermal ablation modality (e.g. IRE, Cryo) | 7 (8.8%) |
| Genomic mutation profile missing               | 41 (51%) |
| < 46 genes tested                              | 4 (5.0%) |
| Combination with Surgery, TACE or other LRT    | 5 (6.2%) |
| Unknown                                        | 146      |

```
data <- data %>% filter(exclude_reason %in% c(NA, 3, 4))  
  
data$mutation.analysis <- data$exclude_reason %in% c(NA) & !is.na(data$apc)  
  
data %>% select(mutation.analysis) %>%  
  tbl_summary(label = list(mutation.analysis = 'Included for mutation analysis'))
```

| <b>Characteristic</b>          | <b>N = 191</b> |
|--------------------------------|----------------|
| Included for mutation analysis | 101 (53%)      |

Total 191 included for progression pattern analysis and 101 for mutation analysis.

## 2.4 Preprocess

```
data <- within(data, {
  deceased = deceased == 1
  gt_46_tested <- data$nr_tested_genes >= 46
  nr_tested_genes = ifelse(is.na(nr_tested_genes), 0, nr_tested_genes)
  a0_ablation = a0_ablation == 1
  n_positive = n_positive == 1
  max_diameter = max_diameter / 10.0
  repeat_lrt = repeat_lrt == 1
  prior_resection = prior_resection == 1
  os_m = overall_survival / 30.25
  metastasis = factor(metastasis_sync,
                      levels = c("sync", "meta"),
                      labels = c("Synchronous", "Metachronous"))
})

data <- within(data, {
  ablation_modality = as.factor(ablation_modality)
  cohort = factor(cohort, labels = c("2005-2015", "2015-2020"))
  year_num = as.numeric(format(data$date_of_ablation, '%Y'))
  year = as.factor(format(data$date_of_ablation, '%Y'))
})

data <- within(data, {
  ltp = ifelse(intrahepatic_recurrence == FALSE, FALSE, local_recurrence == 1)
  ltpfs = ifelse(ltp, time_to_lc, time_to_lfu)
  ihp_outside = ifelse(intrahepatic_recurrence == FALSE, FALSE, new_intrahepatic_lesions == 1)
  ihpfs_outside = ifelse(ihp_outside, time_to_new_lesions, time_to_lfu)
  repeat_lrt = ifelse(intrahepatic_recurrence, repeat_lrt, FALSE)
  ihp_any = ltp | ihp_outside
  ihpfs_any = ifelse(ihp_any, ifelse(ltpfs < ihpfs_outside, ltpfs, ihpfs_outside), time_to_lfu)
})

data$os_ihp = data$overall_survival - data$ihpfs_any
data$os_ihp_m = data$os_ihp / 30.25

data <- within(data, {
  ehp = extrahepatic_recurrence == 1
  ehpf = ifelse(ehp, time_to_ehp, time_to_lfu)
  ehmf = ehmf == 1
})

data$any_progression <- data$ltp | data$ihp_outside | data$ehp

data <- within(data, {
  chemo_yes_no = chemo_yes_no == 1
  chemo_lines = ifelse(chemo_lines == "NAVU", NA, as.numeric(chemo_lines))
})

tmp = list(primary_side = factor(data$primary_location_detail))
```

```

levels(tmp$primary_side) <- list(
  Right = c("ce","ac", "hf"),
  Left = c("dc","r","rs", "sc","sf"),
  Transverse = c("tc")
)
data$primary_side <- tmp$primary_side

data <- within(data, {
  right_side = primary_side == "Right"
  ehpf_before = ifelse(ehp,
    ifelse(ihp_any, ehpf <= ihpf_outside & ehpf <= ltpf, TRUE), FALSE)
  time_to_lfu_m = time_to_lfu / 30.25
  time_to_lfu_y = time_to_lfu / 365
  ehpf_m = ehpf / 30.25
  ihpf_outside_m = ihpf_outside / 30.25
  ltpf = ltpf / 30.25
  ehpf_before = ifelse(ehpf_before, ehpf, ihpf_any)
})

```

## 2.5 Extract mutations

```
cols.p53.logic <- c("mdm2", "mdm4", "cdkn2a", "tp53", "atm")
data[cols.p53.logic] <- sapply(data[cols.p53.logic], as.logical)

cols.tgfb.logic <- c("smad4")
data[cols.tgfb.logic] <- sapply(data[cols.tgfb.logic], as.logical)

cols.wnt.logic <- c("rnf43", "apc", "ctnnb1")
data[cols.wnt.logic] <- sapply(data[cols.wnt.logic], as.logical)

cols.ras.logic <- c("egfr", "erbb2", "erbb3", "erbb4", "met", "pdgfra", "fgfr1",
                  "fgfr2", "fgfr3", "fgfr4", "kit", "igf1r", "ret", "ros1", "alk",
                  "flt3", "ntrk1", "jak2", "cbl", "abl1", "nf1", "ptpn11",
                  "kras", "nras", "hras", "araf", "braf", "raf1", "rac1",
                  "mapk1", "map2k1", "map2k2", "ntrk2", "ntrk3", "crebbp")
data[cols.ras.logic] <- sapply(data[cols.ras.logic], as.logical)

cols.pi3k.logic <- c("pik3ca", "pten", "pik3cb", "pik3r1", "akt1", "akt2", "akt3",
                  "ppp2r1a", "stk11", "tsc1", "tsc2", "rheb", "riCTOR", "mtor")
data[cols.pi3k.logic] <- sapply(data[cols.pi3k.logic], as.logical)

cols.wnt.logic <- c("rnf43", "apc", "ctnnb1")
data[cols.wnt.logic] <- sapply(data[cols.wnt.logic], as.logical)

cols.notch.logic <- c("fbxw7", "notch1", "notch2", "notch3")
data[cols.notch.logic] <- sapply(data[cols.notch.logic], as.logical)

cols.cell.logic <- c("cdkn1b", "cdkn2b", "ccne1", "rb1", "ccnd1", "ccnd2", "ccnd3",
                  "cdk2", "cdk4", "cdk6")
data[cols.cell.logic] <- sapply(data[cols.cell.logic], as.logical)
```

### 2.5.1 Grouping KRAS, NRAS, BRAF into one category RAS/BRAF

```
data$rasbraf <- data$kras | data$nras | data$braf
```

### 2.5.2 Grouping pathways

```
data <- data %>%
  rowwise() %>%
  mutate(
    p53 = any(mdm2, mdm4, cdkn2a, tp53, atm, na.rm = TRUE),
    tgfb = any(smad4, na.rm = TRUE),
    wnt = any(rnf43, apc, ctnnb1, na.rm = TRUE),
    ras = any(egfr, erbb2, erbb3, erbb4, met, pdgfra, fgfr1, fgfr2, fgfr3,
             fgfr4, kit, igf1r, ret, ros1, alk,
             flt3, ntrk1, jak2, cbl, abl1, nf1, ptpn11, kras, hras, nras,
             araf, braf, raf1, rac1, mapk1, map2k1,
```



```
        map2k2, ntrk2, ntrk3, crebbp, na.rm = TRUE),
  pi3k = any(pik3ca, pten, akt1, pik3cb, pik3r1, akt2, akt3, ppp2r1a, stk11,
            tsc1, tsc2, rheb, rictor, mtor, na.rm = TRUE),
  notch = any(fbxw7, notch1, notch2, notch3, na.rm=TRUE),
  cell = any(cdkn1b, cdkn2b, cdkn2a, ccn1, rb1, ccnd1, ccnd2, ccnd3, cdk2,
            cdk4, cdk6, na.rm = TRUE)
)
data$wnt <- ifelse(is.na(data$apc), NA, data$wnt)
data <- within(data, {
  num_altered_paths = (p53 + tgfb + ras + pi3k + notch + cell + wnt)
})
```

## 3 Population

### 3.1 Baseline characteristics

```
data.tbl <- data %>%
  haven::as_factor() %>%
  mutate(chemo_lines = as.factor(chemo_lines)) %>%
  select(age_at_procedure, sex, primary_location, right_side, metastasis, n_positive,
         prior_resection, ehm, nr_of_tumors, max_diameter, time_to_lfu_m,
         chemo_yes_no, chemo_lines, chemo_regimen___5fu1, chemo_regimen___ox,
         chemo_regimen___iri, chemo_regimen___bev) %>%
  tbl_summary(
    label = list(age_at_procedure ~ "Age",
                 sex ~ "Sex",
                 primary_location ~ "Primary location",
                 right_side ~ "Right-sided primary tumor",
                 metastasis ~ "Metastasis",
                 n_positive ~ "Positive lymphnodes",
                 prior_resection ~ "Prior resection",
                 ehm ~ "Extrahepatic metastasis",
                 chemo_yes_no ~ "Pre-ablation chemotherapy",
                 chemo_lines ~ "Lines of pre-ablation chemotherapy",
                 chemo_regimen___5fu1 ~ "Fluorouracil-based regimen",
                 chemo_regimen___ox ~ "Oxaliplatin",
                 chemo_regimen___iri ~ "Irinotecan",
                 chemo_regimen___bev ~ "Use of Bevacizumab",
                 nr_of_tumors ~ "Nr of ablated CLM",
                 max_diameter ~ "Max CLM diameter",
                 time_to_lfu_m ~ "Time to last FU"),
    type = list(nr_of_tumors ~ 'continuous'),
    statistic = list(all_continuous() ~ "{median} [{p25}, {p75}]"),
    digits = list(all_continuous() ~ 2,
                  all_categorical() ~ 1),
    missing_text = "N/A") %>%
  bold_labels()
```

data.tbl

| Characteristic            | N = 191              |
|---------------------------|----------------------|
| Age                       | 56.70 [48.60, 66.55] |
| Sex                       |                      |
| f                         | 70.0 (36.6%)         |
| m                         | 121.0 (63.4%)        |
| Primary location          |                      |
| colon                     | 152.0 (79.6%)        |
| rectum                    | 39.0 (20.4%)         |
| Right-sided primary tumor | 45.0 (23.6%)         |
| Metastasis                |                      |
| Synchronous               | 102.0 (54.3%)        |
| Metachronous              | 86.0 (45.7%)         |

| Characteristic                     | N = 191              |
|------------------------------------|----------------------|
| N/A                                | 3                    |
| Positive lymphnodes                | 114.0 (59.7%)        |
| Prior resection                    | 117.0 (61.3%)        |
| Extrahepatic metastasis            | 111.0 (58.1%)        |
| Nr of ablated CLM                  | 1.00 [1.00, 2.00]    |
| Max CLM diameter                   | 1.40 [1.00, 2.00]    |
| Time to last FU                    | 31.50 [18.46, 44.26] |
| Pre-ablation chemotherapy          | 142.0 (74.3%)        |
| Lines of pre-ablation chemotherapy |                      |
| 1                                  | 83.0 (43.5%)         |
| 2                                  | 54.0 (28.3%)         |
| 3                                  | 5.0 (2.6%)           |
| 0                                  | 49.0 (25.7%)         |
| Fluorouracil-based regimen         | 127.0 (66.5%)        |
| Oxaliplatin                        | 74.0 (38.7%)         |
| Irinotecan                         | 70.0 (36.6%)         |
| Use of Bevacizumab                 | 90.0 (47.1%)         |

```
data.tbl %>% as_gt() %>% gtsave(filename = "out/population.rtf")
```

### 3.2 Baseline survival

```
data$clm <- TRUE

ggsurvplot(survfit(Surv(os_m, deceased) ~ 1, data = data),
  data = data,
  risk.table = TRUE, tables.height = 0.25,
  surv.median.line = 'hv',
  xlim = c(0, 60), break.time.by = 12, xlab = "Months",
  palette = "lancet")
```

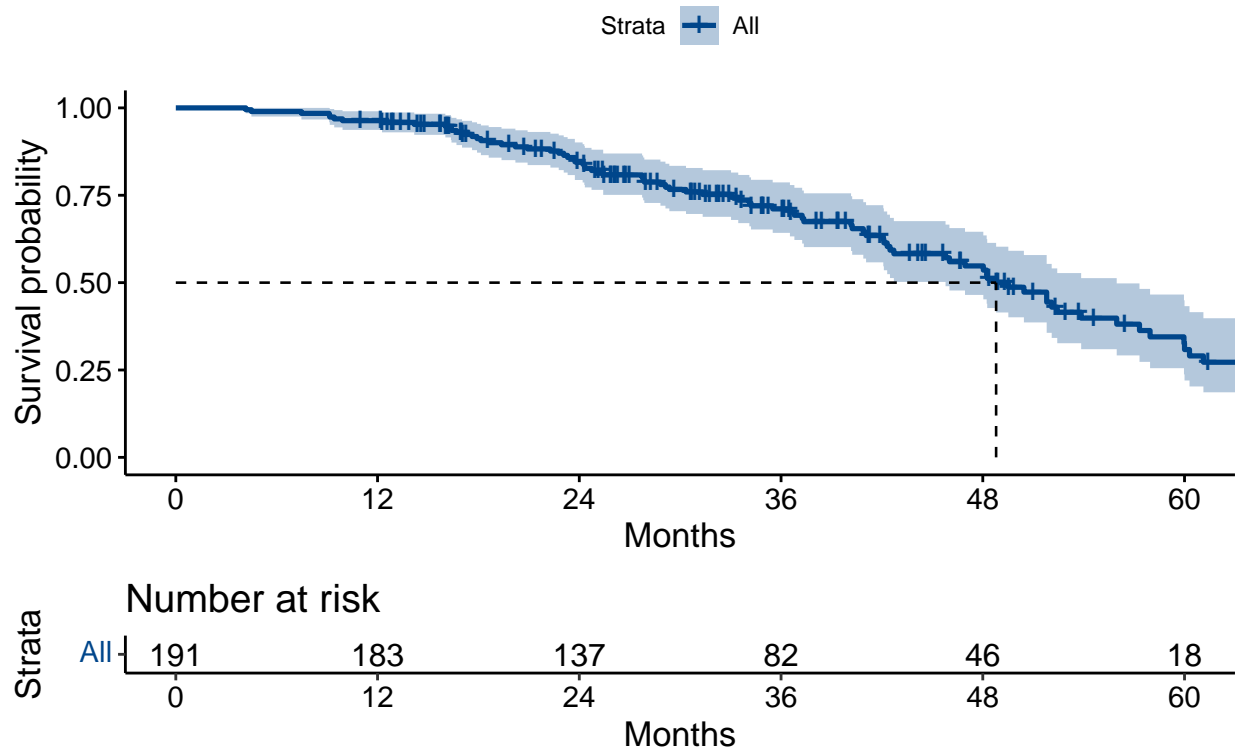

### 3.3 Overview mutations

```
mutations.tbl <- data %>%
  filter(mutation.analysis) %>%
  haven::as_factor() %>%
  select(p53, tp53, ras, rasbraf, wnt, apc, tgfb, smad4, pi3k, pik3ca,
         notch, fbxw7, cell, rb1) %>%
  tbl_summary(
    digits = list(all_categorical() ~ 1),
    missing_text = "N/A") %>%
  bold_labels()

mutations.tbl
```

| Characteristic | N = 101      |
|----------------|--------------|
| <b>p53</b>     | 75.0 (74.3%) |
| <b>tp53</b>    | 75.0 (74.3%) |
| <b>ras</b>     | 48.0 (47.5%) |
| <b>rasbraf</b> | 42.0 (41.6%) |
| <b>wnt</b>     | 64.0 (63.4%) |
| <b>apc</b>     | 61.0 (60.4%) |
| <b>tgfb</b>    | 16.0 (15.8%) |
| <b>smad4</b>   | 16.0 (15.8%) |
| <b>pi3k</b>    | 17.0 (16.8%) |
| <b>pik3ca</b>  | 12.0 (11.9%) |
| <b>notch</b>   | 5.0 (5.0%)   |
| <b>fbxw7</b>   | 5.0 (5.0%)   |
| <b>cell</b>    | 4.0 (4.0%)   |
| <b>rb1</b>     | 4.0 (4.0%)   |

Exclude RB1 and Cell Cycle pathway from further analysis

### 3.4 Type of progression

```

data$multiple_progression <- apply(data[,c('ihp_outside', 'ltp', 'ehp')], 1, sum) > 1
data$ihp_both <- data$ltp & data$ihp_outside
data$no_progression <- !(data$ltp | data$ihp_outside | data$ehp)

progression.tbl <- data %>%
  select(ltp, ihp_outside, ihp_both, ihp_any, ehpf, no_progression,
         multiple_progression, repeat_lrt, deceased) %>%
  tbl_summary(
    by = deceased,
    label = list(
      ltp = 'Local tumor progression',
      ihp_outside = "Intrahepatic progression outside the ablation zone",
      ihp_both = "Local and outside intrahepatic progression",
      ihp_any = 'Any kind of intrahepatic progression',
      ehpf = 'Extrahepatic progression',
      no_progression = 'No progression',
      multiple_progression = 'Multiple sites of progression',
      repeat_lrt = 'Repeat LRT'
    ),
    digits = list(all_categorical() ~ 1)
  ) %>%
  add_overall() %>%
  add_p() %>%
  bold_labels()

progression.tbl

```

| Characteristic                                     | Overall, N =<br>191 | FALSE, N =<br>109 | TRUE, N =<br>82 | p-value |
|----------------------------------------------------|---------------------|-------------------|-----------------|---------|
| Local tumor progression                            | 43.0 (22.5%)        | 19.0 (17.4%)      | 24.0 (29.3%)    | 0.053   |
| Intrahepatic progression outside the ablation zone | 121.0 (63.4%)       | 62.0 (56.9%)      | 59.0 (72.0%)    | 0.032   |
| Local and outside intrahepatic progression         | 29.0 (15.2%)        | 11.0 (10.1%)      | 18.0 (22.0%)    | 0.024   |
| Any kind of intrahepatic progression               | 135.0 (70.7%)       | 70.0 (64.2%)      | 65.0 (79.3%)    | 0.024   |
| Extrahepatic progression                           | 143.0 (74.9%)       | 72.0 (66.1%)      | 71.0 (86.6%)    | 0.001   |
| No progression                                     | 26.0 (13.6%)        | 20.0 (18.3%)      | 6.0 (7.3%)      | 0.028   |
| Multiple sites of progression                      | 115.0 (60.2%)       | 54.0 (49.5%)      | 61.0 (74.4%)    | <0.001  |
| Repeat LRT                                         | 71.0 (37.2%)        | 48.0 (44.0%)      | 23.0 (28.0%)    | 0.024   |

## 4 Overall survival

```
model.format <- forest_model_format_options(point_size = 3)
```

### 4.1 By progression pattern

*Not adjusted*

```
os.multivariable <- coxph(Surv(os_m, deceased) ~ age_at_procedure +  
  ltp + ihp_outside + repeat_lrt + ehp,  
  data = data)  
  
forest_model(model = os.multivariable,  
  exponentiate = TRUE,  
  exclude_infinite_cis = TRUE,  
  format_options = model.format)
```

| Variable         | N   | Hazard ratio                                                                        |                   | p      |
|------------------|-----|-------------------------------------------------------------------------------------|-------------------|--------|
| age_at_procedure | 191 |  | 1.01 (0.99, 1.03) | 0.24   |
| ltp              | 191 |  | 1.87 (1.14, 3.09) | 0.01   |
| ihp_outside      | 191 |  | 3.54 (2.01, 6.22) | <0.001 |
| repeat_lrt       | 191 |  | 0.28 (0.16, 0.48) | <0.001 |
| ehp              | 191 |  | 1.72 (0.87, 3.39) | 0.12   |

```
os.multivariable %>% tbl_regression(  
  exponentiate = TRUE,  
  show_single_row = all_categorical()  
)
```

| Characteristic   | HR   | 95% CI     | p-value |
|------------------|------|------------|---------|
| age_at_procedure | 1.01 | 0.99, 1.03 | 0.2     |
| ltp              | 1.87 | 1.14, 3.09 | 0.014   |
| ihp_outside      | 3.54 | 2.01, 6.22 | <0.001  |
| repeat_lrt       | 0.28 | 0.16, 0.48 | <0.001  |
| ehp              | 1.72 | 0.87, 3.39 | 0.12    |

```

data$no_progression <- !data$any_progression

os.multivariable <- coxph(Surv(os_m, deceased) ~ age_at_procedure + prior_resection +
  max_diameter + nr_of_tumors + right_side + ehm +
  ltp + ihp_outside + repeat_lrt + ehp,
  data = data)

forest_model(model = os.multivariable,
  exponentiate = TRUE,
  exclude_infinite_cis = TRUE,
  format_options = model.format)

```

| Variable         | N   | Hazard ratio      | p      |
|------------------|-----|-------------------|--------|
| age_at_procedure | 191 | 1.01 (0.99, 1.03) | 0.409  |
| prior_resection  | 191 | 0.74 (0.45, 1.22) | 0.240  |
| max_diameter     | 191 | 1.40 (1.07, 1.85) | 0.015  |
| nr_of_tumors     | 191 | 1.79 (1.18, 2.71) | 0.006  |
| right_side       | 191 | 1.58 (0.90, 2.77) | 0.111  |
| ehm              | 191 | 0.94 (0.59, 1.51) | 0.804  |
| ltp              | 191 | 1.48 (0.85, 2.58) | 0.170  |
| ihp_outside      | 191 | 3.44 (1.90, 6.24) | <0.001 |
| repeat_lrt       | 191 | 0.20 (0.10, 0.40) | <0.001 |
| ehp              | 191 | 1.70 (0.86, 3.37) | 0.126  |

0.1 0.2 0.5 1 2 5

```

os.multi.tbl <- os.multivariable %>% tbl_regression(
  label = list(age_at_procedure ~ "Age",
    prior_resection ~ "Prior resection",
    max_diameter ~ "Diameter of largest CLM",
    nr_of_tumors ~ "Number of ablated CLM",
    right_side ~ "Right side primary",
    ehm ~ "Presence of extrahepatic metastasis",

```



```

    ltp ~ "Progression of ablated tumors",
    ihp_outside ~ "Development of new intrahepatic tumors",
    repeat_lrt ~ "Salvage LRT for intrahepatic progression",
    ehpf ~ "Extrahepatic progression"),
  exponentiate = TRUE,
  show_single_row = all_categorical(),
  pvalue_fun = function(x) style_pvalue(x, digits = 2),
  estimate_fun = function(x) style_ratio(x, digits = 2)
)
os.multi.tbl

```

| Characteristic                           | HR   | 95% CI     | p-value |
|------------------------------------------|------|------------|---------|
| Age                                      | 1.01 | 0.99, 1.03 | 0.41    |
| Prior resection                          | 0.74 | 0.45, 1.22 | 0.24    |
| Diameter of largest CLM                  | 1.40 | 1.07, 1.85 | 0.015   |
| Number of ablated CLM                    | 1.79 | 1.18, 2.71 | 0.006   |
| Right side primary                       | 1.58 | 0.90, 2.77 | 0.11    |
| Presence of extrahepatic metastasis      | 0.94 | 0.59, 1.51 | 0.80    |
| Progression of ablated tumors            | 1.48 | 0.85, 2.58 | 0.17    |
| Development of new intrahepatic tumors   | 3.44 | 1.90, 6.24 | <0.001  |
| Salvage LRT for intrahepatic progression | 0.20 | 0.10, 0.40 | <0.001  |
| Extrahepatic progression                 | 1.70 | 0.86, 3.37 | 0.13    |

```

os.multi.tbl %>% as_gt() %>% gtsave(filename = "out/os.rtf")

```

```

source("R/my_forest_plot.R")

```

```

os.multi.tbl$table_body %>%
  select(var_label, estimate, conf.low, conf.high) %>%
  mutate(estimate = log(estimate),
         conf.low = log(conf.low),
         conf.high = log(conf.high)) %>%
  arrange(abs(estimate)) %>%
  ggdotplot(., x = 'var_label', y = 'estimate',
            fill = "estimate",
            orientation = 'horizontal',
            xlab = "Parameter", ylab = "log HR") +
  scale_fill_gsea() +
  guides(fill="none") +
  geom_errorbar(aes(group = var_label, ymax = conf.high, ymin = conf.low),
               position = position_dodge(width = 0.8), width = 0.25) +
  geom_hline(yintercept = 0, linetype = "dashed")

```

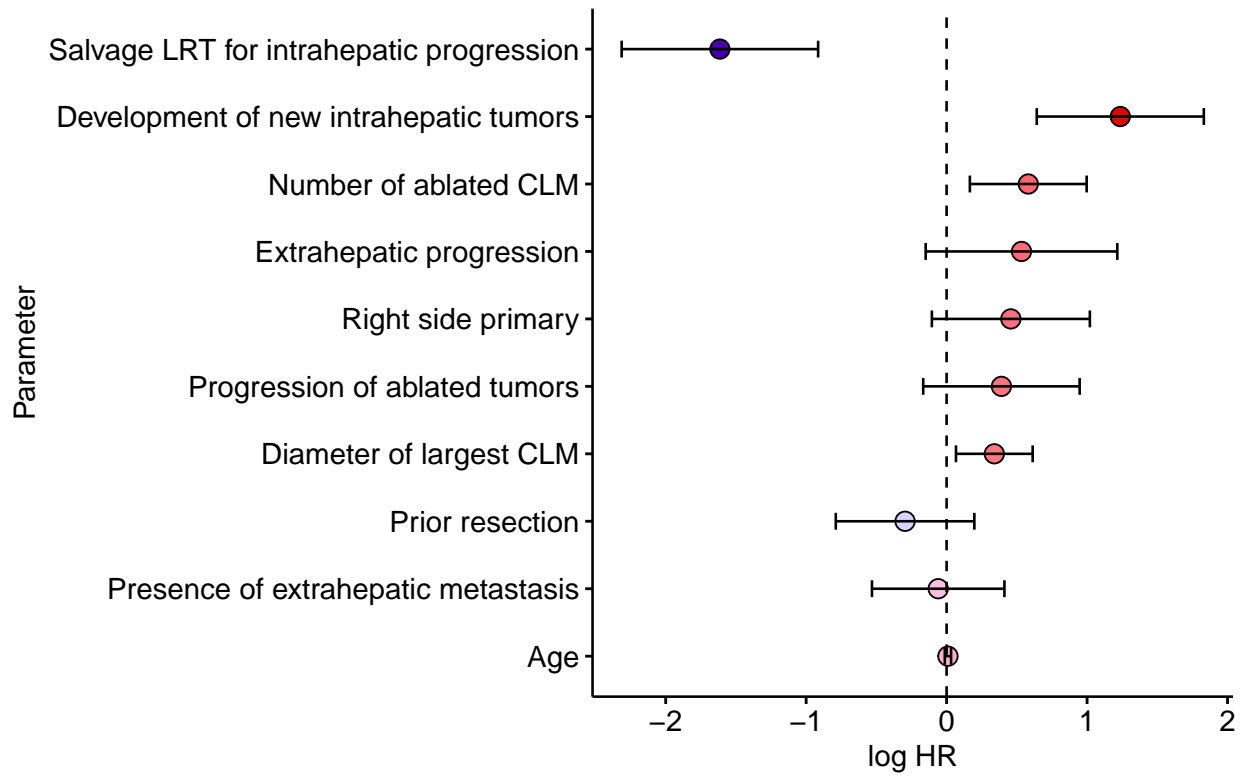

## 5 Intrahepatic progression anywhere

```
ihpfs.any <- coxph(Surv(ihpfs_any, ihp_any) ~ age_at_procedure + prior_resection + a0_ablation +
  max_diameter + nr_of_tumors + ehm + right_side +
  p53 + ras + wnt + tgfb + pi3k + notch + cell,
  data = data)

forest_model(model = ihpfs.any,
  exponentiate = TRUE,
  format_options = model.format)
```

| Variable         | N   | Hazard ratio |                   | p     |
|------------------|-----|--------------|-------------------|-------|
| age_at_procedure | 101 |              | 1.00 (0.97, 1.02) | 0.935 |
| prior_resection  | 101 |              | 1.09 (0.66, 1.80) | 0.740 |
| a0_ablation      | 101 |              | 0.42 (0.22, 0.82) | 0.010 |
| max_diameter     | 101 |              | 1.20 (0.91, 1.57) | 0.192 |
| nr_of_tumors     | 101 |              | 1.42 (0.96, 2.09) | 0.077 |
| ehm              | 101 |              | 0.75 (0.43, 1.31) | 0.316 |
| right_side       | 101 |              | 0.90 (0.48, 1.66) | 0.725 |
| p53              | 101 |              | 0.97 (0.54, 1.75) | 0.923 |
| ras              | 101 |              | 0.68 (0.38, 1.20) | 0.179 |
| wnt              | 101 |              | 0.56 (0.33, 0.94) | 0.030 |
| tgfb             | 101 |              | 2.74 (1.42, 5.27) | 0.003 |
| pi3k             | 101 |              | 1.00 (0.51, 1.98) | 0.996 |
| notch            | 101 |              | 0.63 (0.17, 2.29) | 0.482 |
| cell             | 101 |              | 2.53 (0.78, 8.20) | 0.121 |

```
ihpfs.any.tbl <- ihpfs.any %>% tbl_regression(
  label = list(age_at_procedure ~ "Age",
    prior_resection ~ "Prior resection",
    a0_ablation ~ "A0 ablation",
    max_diameter ~ "Diameter of largest CLM",
    nr_of_tumors ~ "Number of ablated CLM",
    right_side ~ "Right side primary",
    ehm ~ "Presence of extrahepatic metastasis",
    p53 ~ "p53",
    ras ~ "RTK-RAS",
    wnt ~ "Wnt",
    tgfb ~ "TGFb",
    pi3k ~ "PI3K",
    notch ~ "Notch",
    cell ~ "Cell"),
```

```

exponentiate = TRUE,
show_single_row = all_categorical(),
pvalue_fun = function(x) style_pvalue(x, digits = 2),
estimate_fun = function(x) style_ratio(x, digits = 2)
)
ihpfs.any.tbl

```

| Characteristic                      | HR   | 95% CI     | p-value |
|-------------------------------------|------|------------|---------|
| Age                                 | 1.00 | 0.97, 1.02 | 0.94    |
| Prior resection                     | 1.09 | 0.66, 1.80 | 0.74    |
| A0 ablation                         | 0.42 | 0.22, 0.82 | 0.010   |
| Diameter of largest CLM             | 1.20 | 0.91, 1.57 | 0.19    |
| Number of ablated CLM               | 1.42 | 0.96, 2.09 | 0.077   |
| Presence of extrahepatic metastasis | 0.75 | 0.43, 1.31 | 0.32    |
| Right side primary                  | 0.90 | 0.48, 1.66 | 0.73    |
| p53                                 | 0.97 | 0.54, 1.75 | 0.92    |
| RTK-RAS                             | 0.68 | 0.38, 1.20 | 0.18    |
| Wnt                                 | 0.56 | 0.33, 0.94 | 0.030   |
| TGFb                                | 2.74 | 1.42, 5.27 | 0.003   |
| PI3K                                | 1.00 | 0.51, 1.98 | >0.99   |
| Notch                               | 0.63 | 0.17, 2.29 | 0.48    |
| Cell                                | 2.53 | 0.78, 8.20 | 0.12    |

```
ihpfs.any.tbl %>% as_gt() %>% gtsave(filename = "out/ihpfs_any.rtf")
```

```

ihpfs.any.tbl$table_body %>%
  select(var_label, estimate, conf.low, conf.high) %>%
  mutate(estimate = log(estimate),
         conf.low = log(conf.low),
         conf.high = log(conf.high)) %>%
  arrange(abs(estimate)) %>%
  ggdotplot(., x = 'var_label', y = 'estimate',
            fill = "estimate",
            orientation = 'horizontal',
            xlab = "Parameter", ylab = "log HR") +
  scale_fill_gsea() +
  guides(fill="none") +
  geom_errorbar(aes(group = var_label, ymax = conf.high, ymin = conf.low),
               position = position_dodge(width = 0.8), width = 0.25) +
  geom_hline(yintercept = 0, linetype = "dashed")

```

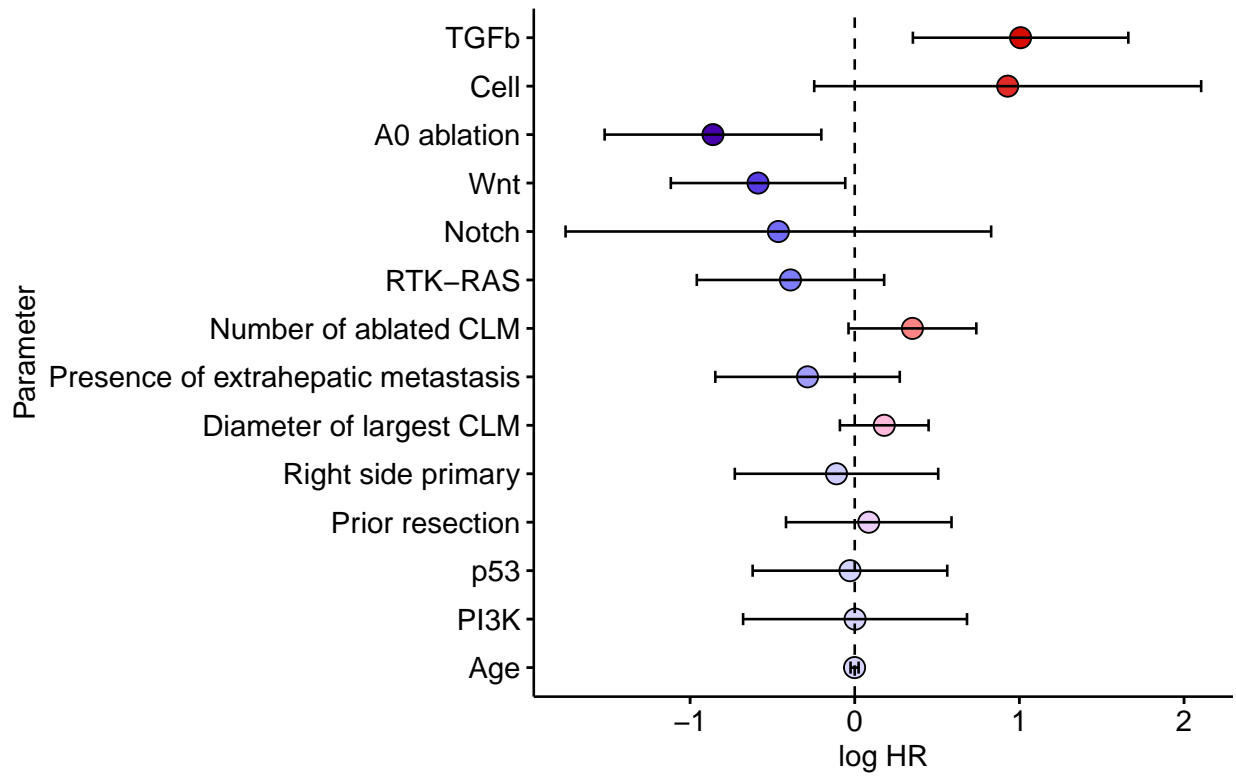

```

ggsurvplot(survfit(Surv(ihpfs_any / 30.25, ihp_any) ~ wnt,
                  data = data[data$mutation.analysis,]),
           pval = TRUE, risk.table = TRUE, conf.int = FALSE,
           pval.coord = c(12, 0.25),
           data = data[data$mutation.analysis,],
           legend.labs = c("Wnt not altered", "Wnt altered"),
           xlim = c(0, 60), break.time.by = 12, xlab = "Months",
           ylim = c(0, 1),
           ylab = "Probability of intrahepatic progression",
           palette = "lancet", fun = "event",
           linetype = c("strata"))

```

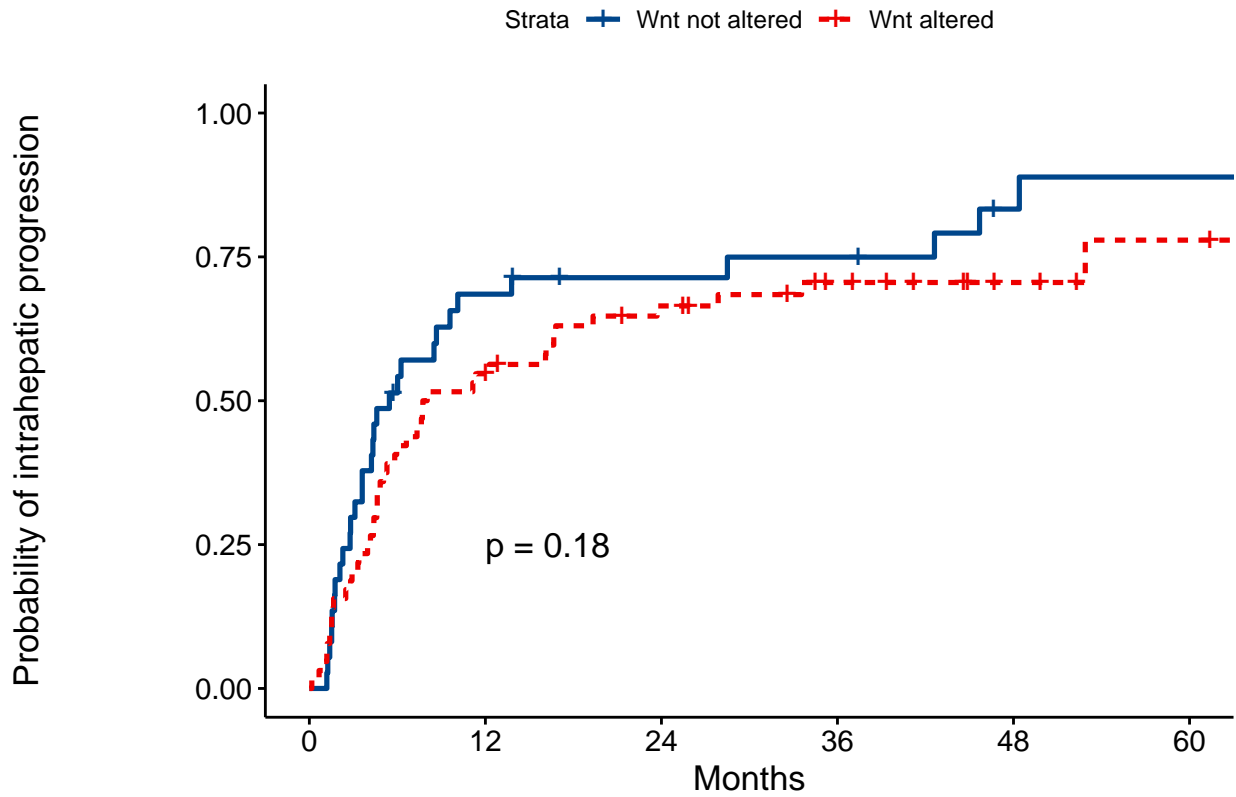

Number at risk

| Strata          | 0  | 12 | 24 | 36 | 48 | 60 |
|-----------------|----|----|----|----|----|----|
| Wnt not altered | 37 | 11 | 8  | 7  | 3  | 2  |
| Wnt altered     | 64 | 29 | 19 | 12 | 6  | 3  |

Months

## 5.1 Intrahepatic progression outside the ablation zone

```
data.ihp <- data %>% filter(ihp_any)
```

```
ihpfs.out <- coxph(Surv(ihpfs_outside, ihp_outside) ~ age_at_procedure + prior_resection +
  max_diameter + nr_of_tumors + ehm + a0_ablation + right_side +
  p53 + ras + wnt + tgfb + pi3k + notch + cell,
  data = data)
```

```
forest_model(model = ihpfs.out,
  exponentiate = TRUE,
  format_options = model.format)
```

| Variable         | N   | Hazard ratio |                   | p     |
|------------------|-----|--------------|-------------------|-------|
| age_at_procedure | 101 |              | 1.00 (0.97, 1.02) | 0.863 |
| prior_resection  | 101 |              | 1.55 (0.90, 2.69) | 0.116 |
| max_diameter     | 101 |              | 1.24 (0.93, 1.66) | 0.148 |
| nr_of_tumors     | 101 |              | 1.77 (1.20, 2.63) | 0.004 |
| ehm              | 101 |              | 0.78 (0.43, 1.42) | 0.416 |
| a0_ablation      | 101 |              | 0.61 (0.31, 1.21) | 0.154 |
| right_side       | 101 |              | 1.24 (0.65, 2.39) | 0.514 |
| p53              | 101 |              | 0.73 (0.39, 1.37) | 0.330 |
| ras              | 101 |              | 0.65 (0.35, 1.20) | 0.165 |
| wnt              | 101 |              | 0.60 (0.35, 1.03) | 0.062 |
| tgfb             | 101 |              | 2.75 (1.39, 5.45) | 0.004 |
| pi3k             | 101 |              | 0.82 (0.37, 1.80) | 0.620 |
| notch            | 101 |              | 1.10 (0.30, 4.11) | 0.882 |
| cell             | 101 |              | 2.12 (0.65, 6.92) | 0.212 |

```
ihpfs.tbl <- ihpfs.out %>% tbl_regression(
  label = list(age_at_procedure ~ "Age",
    prior_resection ~ "Prior resection",
    a0_ablation ~ "A0 ablation",
    max_diameter ~ "Diameter of largest CLM",
    nr_of_tumors ~ "Number of ablated CLM",
    right_side ~ "Right side primary",
    ehm ~ "Presence of extrahepatic metastasis",
    p53 ~ "p53",
    ras ~ "RTK-RAS",
    wnt ~ "Wnt",
    tgfb ~ "TGFb",
    pi3k ~ "PI3K",
```

```

    notch ~ "Notch",
    cell ~ "Cell"),
  exponentiate = TRUE,
  show_single_row = all_categorical(),
  pvalue_fun = function(x) style_pvalue(x, digits = 2),
  estimate_fun = function(x) style_ratio(x, digits = 2)
)
ihpfs.tbl

```

| Characteristic                      | HR   | 95% CI     | p-value |
|-------------------------------------|------|------------|---------|
| Age                                 | 1.00 | 0.97, 1.02 | 0.86    |
| Prior resection                     | 1.55 | 0.90, 2.69 | 0.12    |
| Diameter of largest CLM             | 1.24 | 0.93, 1.66 | 0.15    |
| Number of ablated CLM               | 1.77 | 1.20, 2.63 | 0.004   |
| Presence of extrahepatic metastasis | 0.78 | 0.43, 1.42 | 0.42    |
| A0 ablation                         | 0.61 | 0.31, 1.21 | 0.15    |
| Right side primary                  | 1.24 | 0.65, 2.39 | 0.51    |
| p53                                 | 0.73 | 0.39, 1.37 | 0.33    |
| RTK-RAS                             | 0.65 | 0.35, 1.20 | 0.16    |
| Wnt                                 | 0.60 | 0.35, 1.03 | 0.062   |
| TGFb                                | 2.75 | 1.39, 5.45 | 0.004   |
| PI3K                                | 0.82 | 0.37, 1.80 | 0.62    |
| Notch                               | 1.10 | 0.30, 4.11 | 0.88    |
| Cell                                | 2.12 | 0.65, 6.92 | 0.21    |

```
ihpfs.tbl %>% as_gt() %>% gtsave(filename = "out/ihpfs.rtf")
```

```

ihpfs.tbl$table_body %>%
  select(var_label, estimate, conf.low, conf.high) %>%
  mutate(estimate = log(estimate),
         conf.low = log(conf.low),
         conf.high = log(conf.high)) %>%
  arrange(abs(estimate)) %>%
  ggdotplot(., x = 'var_label', y = 'estimate',
            fill = "estimate",
            orientation = 'horizontal',
            xlab = "Parameter", ylab = "log HR") +
  scale_fill_gsea() +
  guides(fill="none") +
  geom_errorbar(aes(group = var_label, ymax = conf.high, ymin = conf.low),
               position = position_dodge(width = 0.8), width = 0.25) +
  geom_hline(yintercept = 0, linetype = "dashed")

```



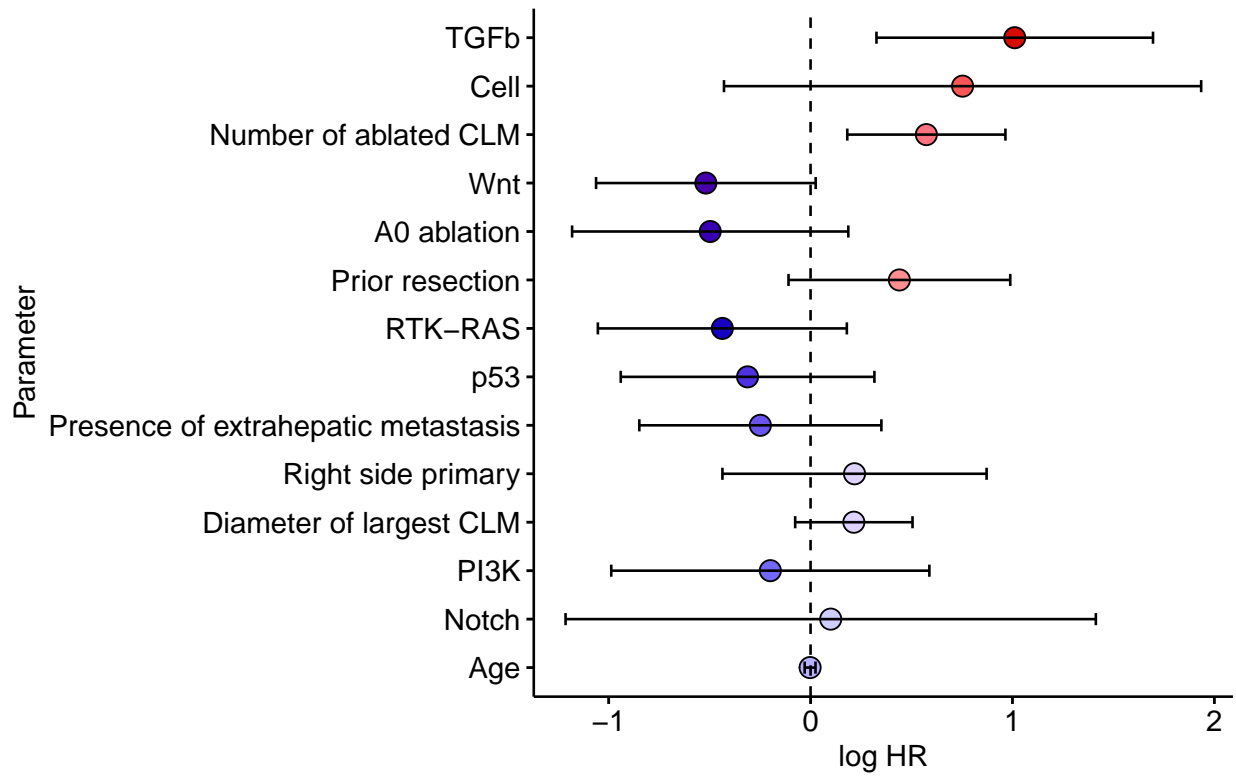

### 5.1.1 Survival curve based on TGFb

```

ggsurvplot(survfit(Surv(ihpfs_outside / 30.25, ihp_outside) ~ tgfb,
                   data = data[data$mutation.analysis, ]),
           pval = TRUE, risk.table = TRUE, conf.int = FALSE,
           pval.coord = c(36, 0.25),
           data = data[data$mutation.analysis, ],
           legend.labs = c("TGF\u03B2 not altered", "TGF\u03B2 altered"),
           xlim = c(0, 60), break.time.by = 12, xlab = "Months",
           ylim = c(0, 1),
           ylab = "Probability of development of new intrahepatic tumors",
           palette = "lancet", fun = "event",
           linetype = c("strata"))

```

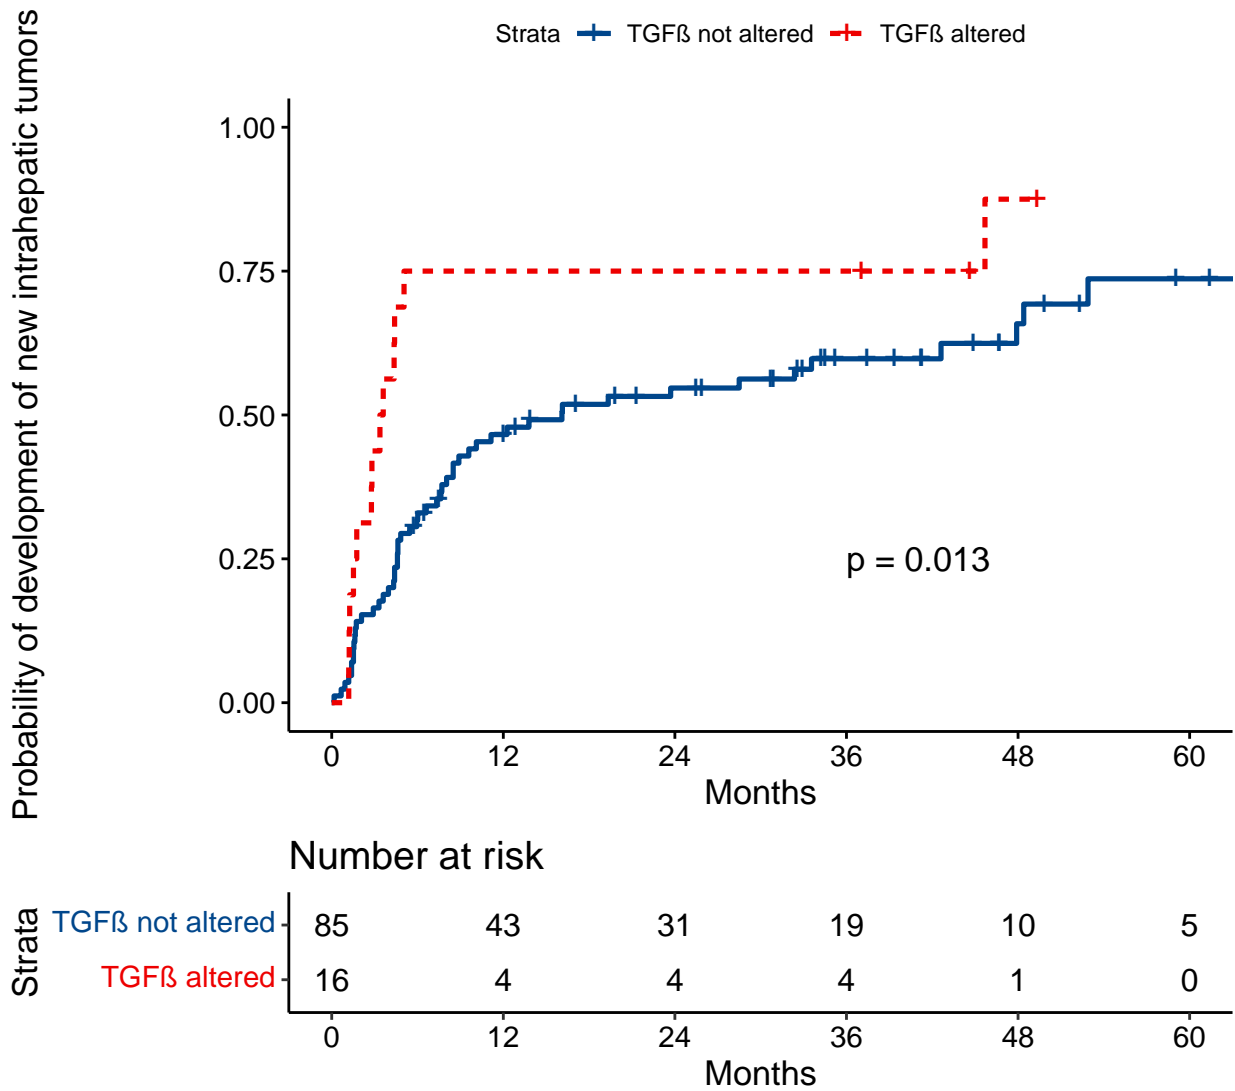

```
ihpfs.tgfb <- survfit(Surv(ihpfs_outside / 30.25, ihp_outside) ~ tgfb,  
                    data = data[data$mutation.analysis,])  
print(ihpfs.tgfb)
```

```
## Call: survfit(formula = Surv(ihpfs_outside/30.25, ihp_outside) ~ tgfb,  
##      data = data[data$mutation.analysis, ])  
##  
##           n events median 0.95LCL 0.95UCL  
## tgfb=FALSE 85     52  16.10    8.50   47.9  
## tgfb=TRUE  16     13   3.49    1.75    NA
```

## 5.2 Intrahepatic progression at the ablation zone

*Notch excluded because it leads to infinite CIs*

```
ltp.multi <- coxph(Surv(ltpfs, ltp) ~ age_at_procedure + prior_resection + right_side +
  max_diameter + nr_of_tumors + ehm + a0_ablation +
  p53 + ras + wnt + tgfb + pi3k + cell,
  data = data)

forest_model(model = ltp.multi,
  exponentiate = TRUE,
  format_options = model.format)
```

| Variable         | N   | Hazard ratio |                   | p    |
|------------------|-----|--------------|-------------------|------|
| age_at_procedure | 101 |              | 0.97 (0.94, 1.01) | 0.20 |
| prior_resection  | 101 |              | 0.36 (0.16, 0.83) | 0.02 |
| right_side       | 101 |              | 0.82 (0.28, 2.34) | 0.71 |
| max_diameter     | 101 |              | 1.59 (1.04, 2.42) | 0.03 |
| nr_of_tumors     | 101 |              | 1.04 (0.55, 1.98) | 0.90 |
| ehm              | 101 |              | 0.56 (0.25, 1.28) | 0.17 |
| a0_ablation      | 101 |              | 0.17 (0.05, 0.66) | 0.01 |
| p53              | 101 |              | 1.42 (0.50, 4.05) | 0.51 |
| ras              | 101 |              | 0.75 (0.32, 1.77) | 0.52 |
| wnt              | 101 |              | 0.83 (0.36, 1.93) | 0.66 |
| tgfb             | 101 |              | 1.46 (0.47, 4.54) | 0.51 |
| pi3k             | 101 |              | 1.03 (0.36, 2.99) | 0.95 |
| cell             | 101 |              | 1.04 (0.12, 9.25) | 0.97 |

0.05 0.1 0.2 0.5 1 2 5

```
ltp.tbl <- ltp.multi %>% tbl_regression(
  label = list(age_at_procedure ~ "Age",
    prior_resection ~ "Prior resection",
    a0_ablation ~ "A0 ablation",
    max_diameter ~ "Diameter of largest CLM",
    nr_of_tumors ~ "Number of ablated CLM",
    right_side ~ "Right side primary",
    ehm ~ "Presence of extrahepatic metastasis",
    p53 ~ "p53",
    ras ~ "RTK-RAS",
    wnt ~ "Wnt",
    tgfb ~ "TGFb",
    pi3k ~ "PI3K",
    cell ~ "Cell"),
```

```

exponentiate = TRUE,
show_single_row = all_categorical(),
pvalue_fun = function(x) style_pvalue(x, digits = 2),
estimate_fun = function(x) style_ratio(x, digits = 2)
)

ltp.tbl

```

| Characteristic                      | HR   | 95% CI     | p-value |
|-------------------------------------|------|------------|---------|
| Age                                 | 0.97 | 0.94, 1.01 | 0.20    |
| Prior resection                     | 0.36 | 0.16, 0.83 | 0.016   |
| Right side primary                  | 0.82 | 0.28, 2.34 | 0.71    |
| Diameter of largest CLM             | 1.59 | 1.04, 2.42 | 0.032   |
| Number of ablated CLM               | 1.04 | 0.55, 1.98 | 0.90    |
| Presence of extrahepatic metastasis | 0.56 | 0.25, 1.28 | 0.17    |
| A0 ablation                         | 0.17 | 0.05, 0.66 | 0.010   |
| p53                                 | 1.42 | 0.50, 4.05 | 0.51    |
| RTK-RAS                             | 0.75 | 0.32, 1.77 | 0.52    |
| Wnt                                 | 0.83 | 0.36, 1.93 | 0.66    |
| TGFb                                | 1.46 | 0.47, 4.54 | 0.51    |
| PI3K                                | 1.03 | 0.36, 2.99 | 0.95    |
| Cell                                | 1.04 | 0.12, 9.25 | 0.97    |

```
ltp.tbl %>% as_gt() %>% gtsave("out/ltp.rtf")
```

```

ltp.tbl$table_body %>%
  select(var_label, estimate, conf.low, conf.high) %>%
  mutate(estimate = log(estimate),
         conf.low = log(conf.low),
         conf.high = log(conf.high)) %>%
  arrange(abs(estimate)) %>%
  ggdotplot(., x = 'var_label', y = 'estimate',
            fill = "estimate",
            orientation = 'horizontal',
            xlab = "Parameter", ylab = "log HR") +
  scale_fill_gsea() +
  guides(fill="none") +
  geom_errorbar(aes(group = var_label, ymax = conf.high, ymin = conf.low),
               position = position_dodge(width = 0.8), width = 0.25) +
  geom_hline(yintercept = 0, linetype = "dashed")

```

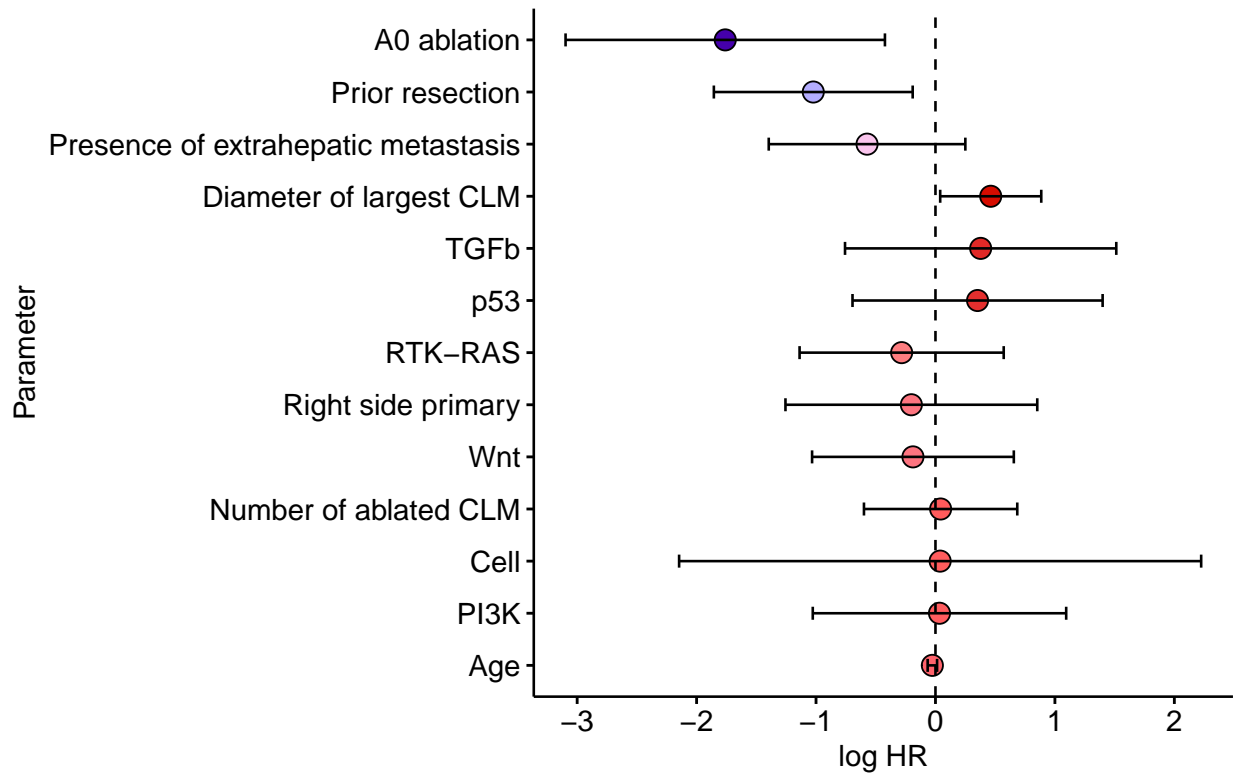

```

ggsurvplot(survfit(Surv(ltpfs, ltp) ~ a0_ablation,
                  data = data[data$mutation.analysis,]),
            pval = TRUE, risk.table = TRUE, conf.int = FALSE,
            pval.coord = c(3, 0.5),
            data = data[data$mutation.analysis,],
            legend.labs = c("Not A0 Ablation", "A0 Ablation"),
            xlim = c(0, 60), ylim = c(0, 1), break.time.by = 12, xlab = "Months",
            ylab = "Probability of progression of ablated tumor",
            palette = "lancet", fun = "event",
            linetype = c("strata"))

```

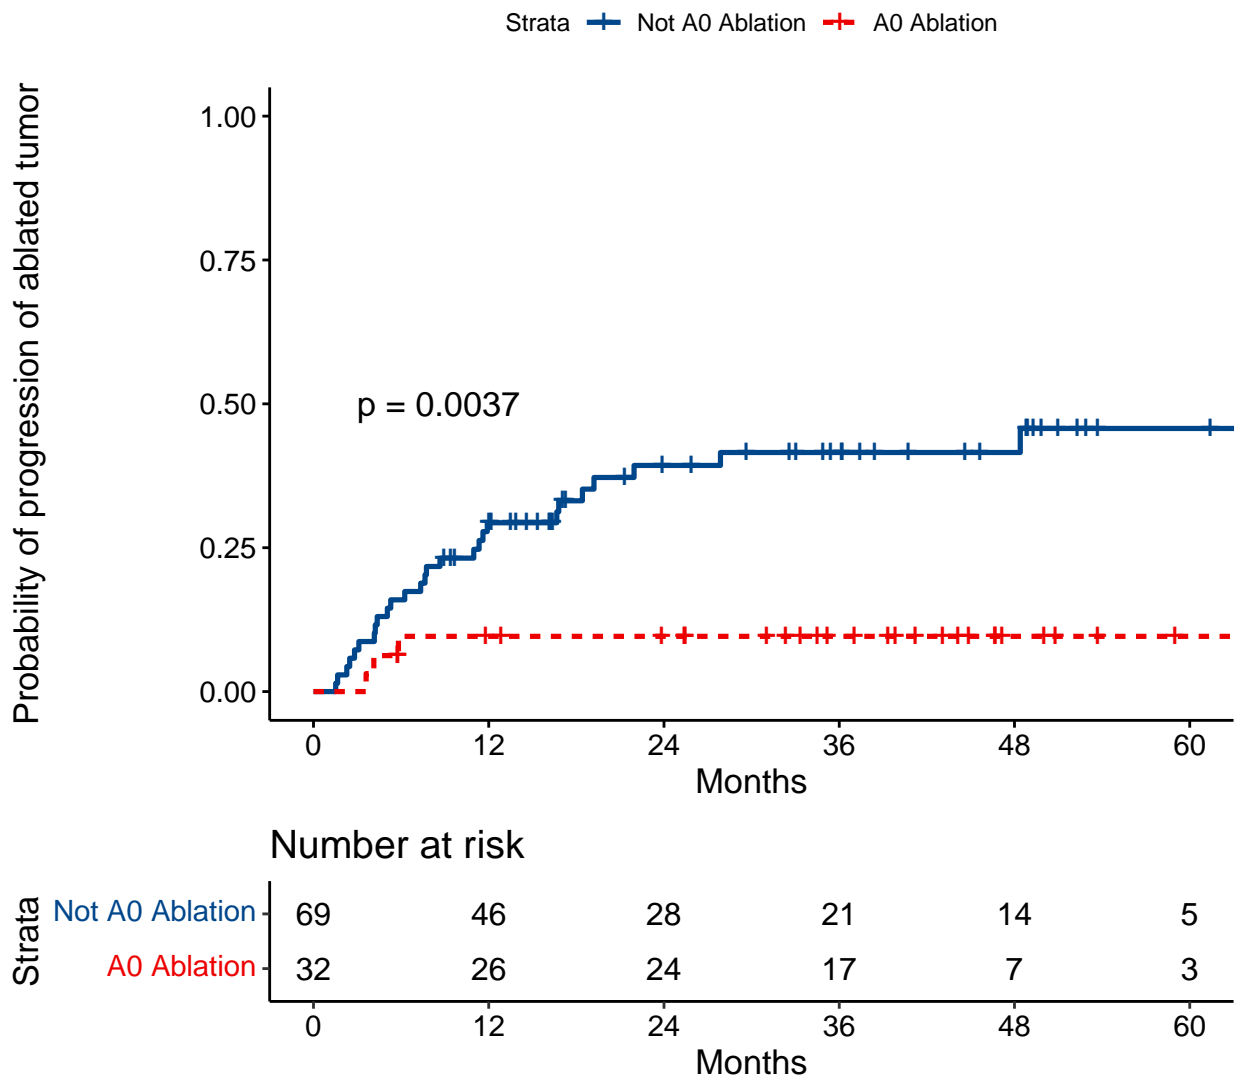

## 6 Salvage LRT

```
m.repeat.lrt <- glm(repeat_lrt ~ age_at_procedure + prior_resection +
                    ehm + right_side +
                    p53 + ras + wnt + tgfb + pi3k + notch + cell,
                    data = data.ihp,
                    family = 'binomial')

forest_model(model = m.repeat.lrt,
             exponentiate = TRUE,
             format_options = model.format)
```

| Variable         | N  | Odds ratio |                    | p     |
|------------------|----|------------|--------------------|-------|
| age_at_procedure | 75 |            | 1.03 (0.98, 1.09)  | 0.256 |
| prior_resection  | 75 |            | 2.71 (0.86, 9.35)  | 0.097 |
| ehm              | 75 |            | 0.67 (0.21, 2.10)  | 0.496 |
| right_side       | 75 |            | 1.02 (0.26, 4.13)  | 0.975 |
| p53              | 75 |            | 0.48 (0.12, 1.71)  | 0.274 |
| ras              | 75 |            | 0.38 (0.11, 1.20)  | 0.106 |
| wnt              | 75 |            | 5.80 (1.94, 19.52) | 0.003 |
| tgfb             | 75 |            | 0.62 (0.13, 2.83)  | 0.531 |
| pi3k             | 75 |            | 1.54 (0.31, 8.90)  | 0.605 |
| notch            | 75 |            | 0.17 (0.01, 2.18)  | 0.186 |
| cell             | 75 |            | 0.49 (0.04, 5.86)  | 0.554 |

0.01 0.05 0.1 0.5 1 5 10

```
repeat.lrt.tbl <- m.repeat.lrt %>% tbl_regression(
  label = list(age_at_procedure ~ "Age",
               prior_resection ~ "Prior resection",
               right_side ~ "Right side primary",
               ehm ~ "Presence of extrahepatic metastasis",
               p53 ~ "p53",
               ras ~ "RTK-RAS",
               wnt ~ "Wnt",
               tgfb ~ "TGFb",
               pi3k ~ "PI3K",
               notch ~ "Notch",
               cell ~ "Cell"),
  exponentiate = TRUE,
  show_single_row = all_categorical(),
```



```

    pvalue_fun = function(x) style_pvalue(x, digits = 2),
    estimate_fun = function(x) style_ratio(x, digits = 2)
  )
repeat.lrt.tbl

```

| Characteristic                      | OR   | 95% CI     | p-value |
|-------------------------------------|------|------------|---------|
| Age                                 | 1.03 | 0.98, 1.09 | 0.26    |
| Prior resection                     | 2.71 | 0.86, 9.35 | 0.10    |
| Presence of extrahepatic metastasis | 0.67 | 0.21, 2.10 | 0.50    |
| Right side primary                  | 1.02 | 0.26, 4.13 | 0.97    |
| p53                                 | 0.48 | 0.12, 1.71 | 0.27    |
| RTK-RAS                             | 0.38 | 0.11, 1.20 | 0.11    |
| Wnt                                 | 5.80 | 1.94, 19.5 | 0.003   |
| TGFb                                | 0.62 | 0.13, 2.83 | 0.53    |
| PI3K                                | 1.54 | 0.31, 8.90 | 0.61    |
| Notch                               | 0.17 | 0.01, 2.18 | 0.19    |
| Cell                                | 0.49 | 0.04, 5.86 | 0.55    |

```
repeat.lrt.tbl %>% as_gt() %>% gtsave("out/repeat.lrt.rtf")
```

```

repeat.lrt.tbl$table_body %>%
  select(var_label, estimate, conf.low, conf.high) %>%
  mutate(estimate = log(estimate),
         conf.low = log(conf.low),
         conf.high = log(conf.high)) %>%
  arrange(abs(estimate)) %>%
  ggdotplot(., x = 'var_label', y = 'estimate',
            fill = "estimate",
            orientation = 'horizontal',
            xlab = "Parameter", ylab = "log OR") +
  scale_fill_gsea() +
  guides(fill="none") +
  geom_errorbar(aes(group = var_label, ymax = conf.high, ymin = conf.low),
               position = position_dodge(width = 0.8), width = 0.25) +
  geom_hline(yintercept = 0, linetype = "dashed")

```

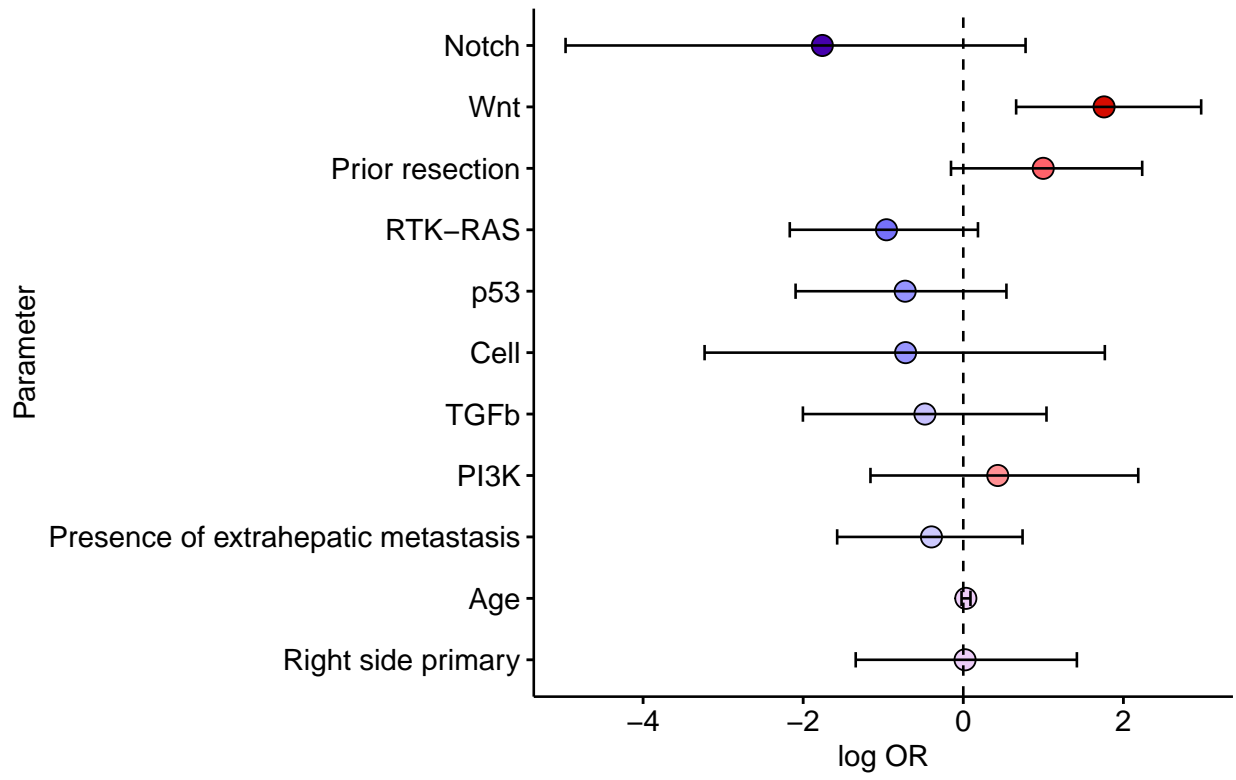

## 6.1 Survival following IHP

```
os.plot <- ggsurvplot(survfit(Surv(os_m, deceased) ~ ihp_any, data = data),
  pval = TRUE, risk.table = TRUE, conf.int = FALSE,
  data = data,
  legend.labs = c("No IHP", "IHP"),
  xlim = c(0, 60), break.time.by = 12, xlab = "Months",
  palette = "lancet",
  linetype = c("strata"))+
  guides(color = guide_legend(override.aes = list(shape = NA)))
```

os.plot

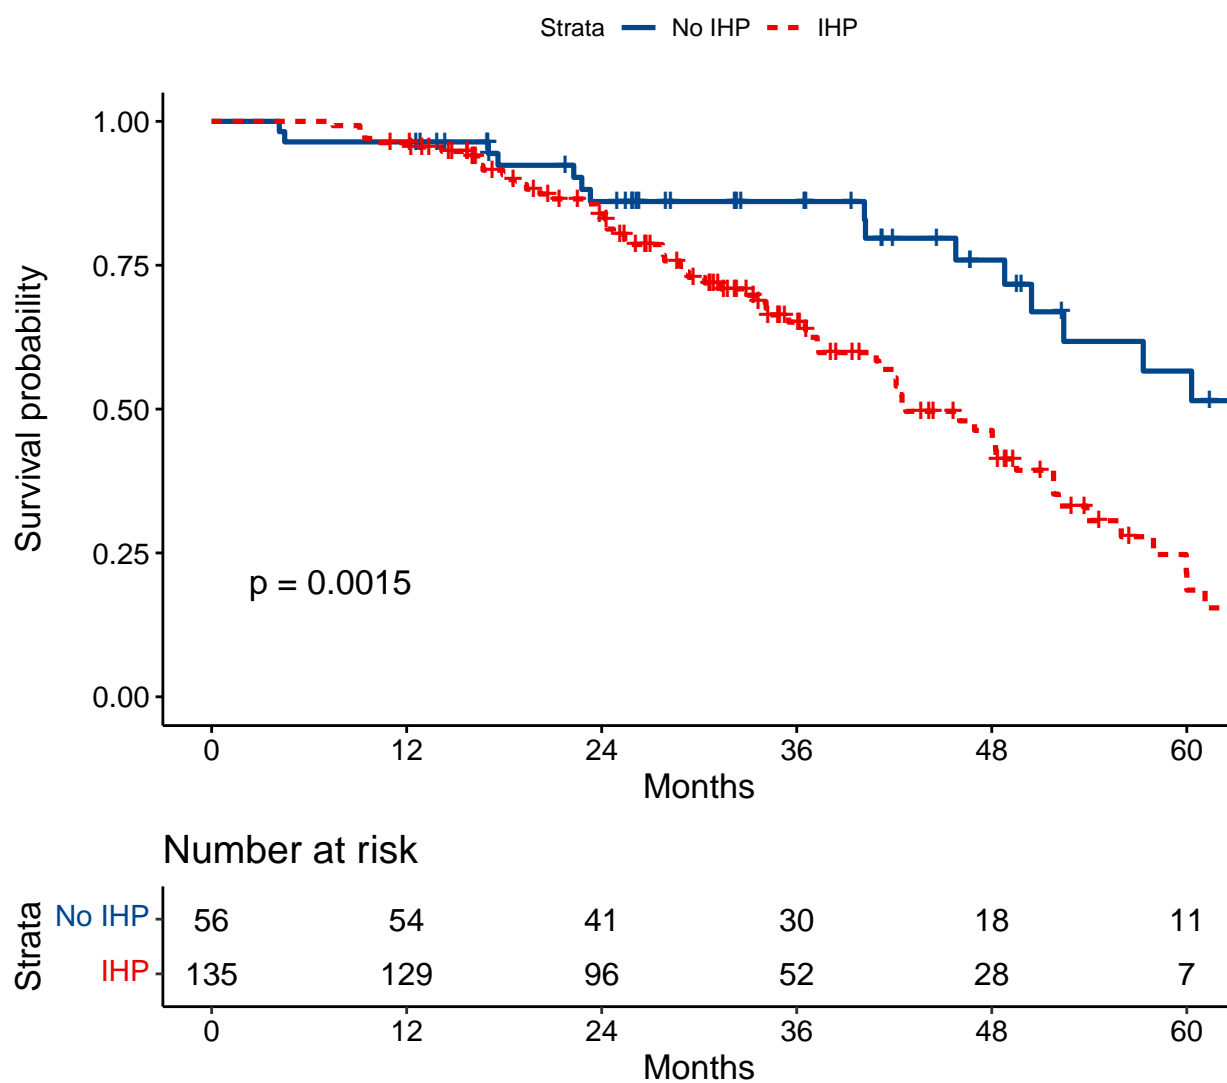

```
os_m.surv <- survfit(Surv(os_m, deceased) ~ ihp_any, data = data)
print(os_m.surv)
```

```
## Call: survfit(formula = Surv(os_m, deceased) ~ ihp_any, data = data)
##
##           n events median 0.95LCL 0.95UCL
## ihp_any=FALSE  56     17   70.3    52.4     NA
## ihp_any=TRUE  135     65   42.7    40.9    51.8
```

## 6.2 Survival after IHP - salvage LRT vs. no salvage LRT

```
os2.plot <- ggsurvplot(survfit(Surv(os_ihp_m, deceased) ~ repeat_lrt, data = data.ihp),
  pval = "p < 0.001", risk.table = TRUE, conf.int = FALSE,
  data = data.ihp,
  legend.labs = c("No sLRT", "sLRT"),
  xlim = c(0, 60), break.time.by = 12, xlab = "Months",
  palette = "lancet",
  linetype = c("strata"))
```

os2.plot

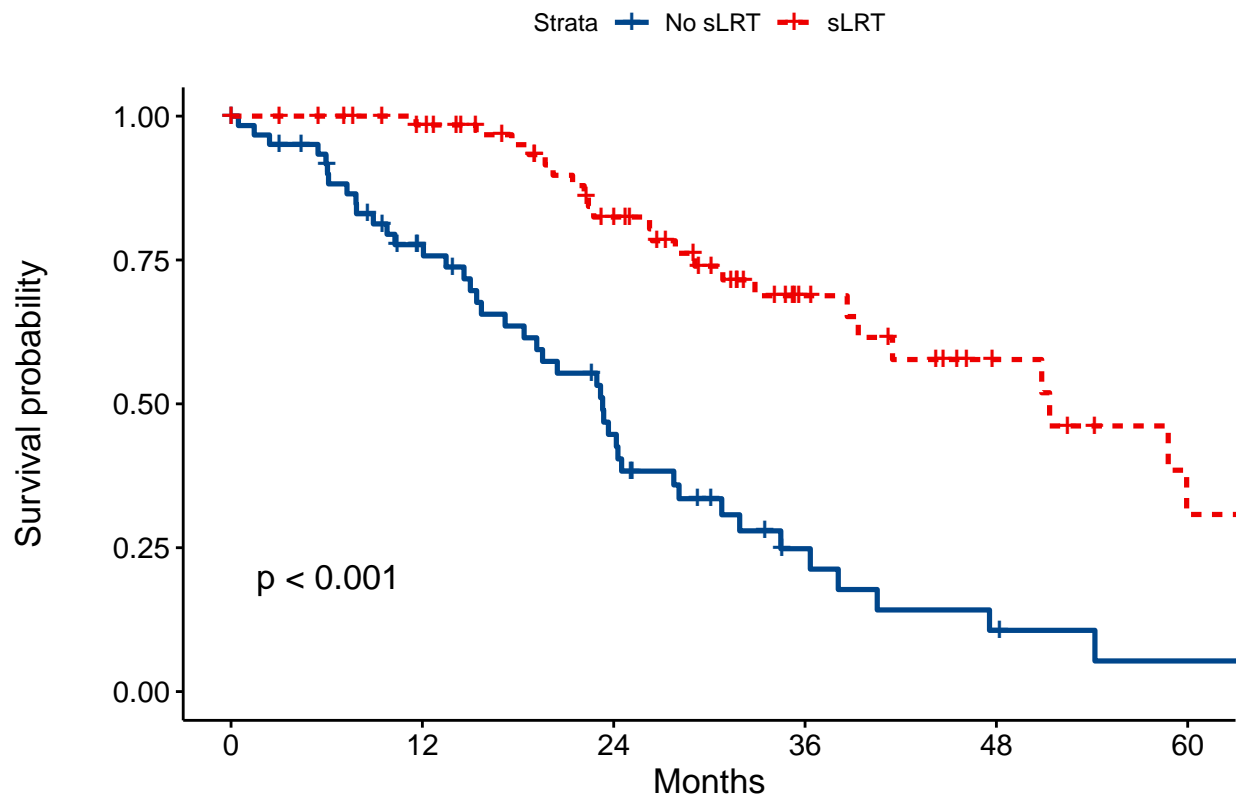

Number at risk

| Strata  | 0  | 12 | 24 | 36 | 48 | 60 |
|---------|----|----|----|----|----|----|
| No sLRT | 64 | 40 | 21 | 7  | 3  | 1  |
| sLRT    | 71 | 63 | 44 | 20 | 10 | 4  |

Months

```
os2_m.surv <- survfit(Surv(os_ihp_m, deceased) ~ repeat_lrt, data = data.ihp)
print(os2_m.surv)
```

```
## Call: survfit(formula = Surv(os_ihp_m, deceased) ~ repeat_lrt, data = data.ihp)
##
##           n events median 0.95LCL 0.95UCL
## repeat_lrt=FALSE 64     42  23.3   18.4   28.1
## repeat_lrt=TRUE  71     23  51.3   39.3   NA
```

## 6.2.1 Combined plot

```
ggarrange(os.plot$plot, os2.plot$plot, os.plot$table, os2.plot$table,
  labels = c("A", "B"),
  ncol = 2, nrow = 2, heights = c(2.5, 0.8),
  align = "v")
```

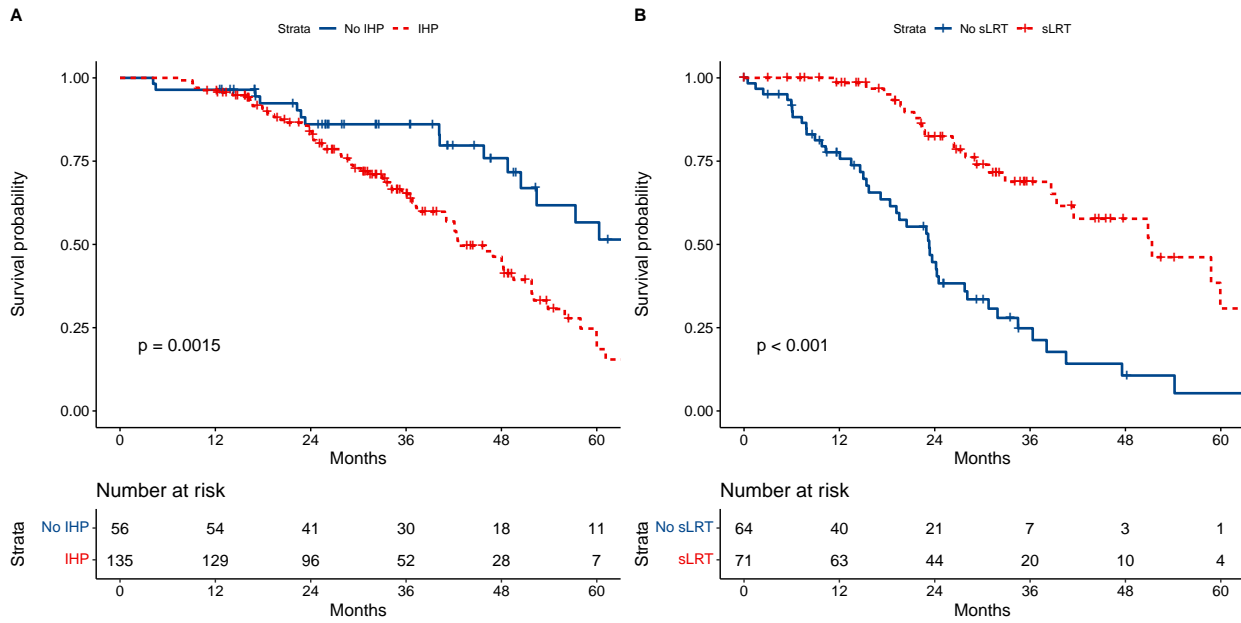

## 7 Frequency of mutations

```
data.grouped <- data %>% filter(mutation.analysis) %>%
  group_by(race) %>%
  summarise(
    n = n(),
    n_tot = n(),
    p53 = sum(p53),
    Wnt = sum(wnt),
    "RTK-RAS" = sum(ras),
    PI3K = sum(pi3k),
    TGFb = sum(tgfb),
    Notch = sum(notch),
    "Cell Cycle" = sum(cell),
  )
data.grouped
```

| race | n  | n_tot | p53 | Wnt | RTK-RAS | PI3K | TGFb | Notch | Cell Cycle |
|------|----|-------|-----|-----|---------|------|------|-------|------------|
| af   | 10 | 10    | 8   | 6   | 6       | 4    | 1    | 0     | 0          |
| as   | 5  | 5     | 4   | 2   | 2       | 1    | 0    | 0     | 0          |
| cauc | 77 | 77    | 57  | 51  | 35      | 10   | 13   | 4     | 3          |
| his  | 6  | 6     | 6   | 3   | 2       | 1    | 1    | 1     | 1          |
| NA   | 3  | 3     | 0   | 2   | 3       | 1    | 1    | 0     | 0          |

```
data.grouped.wide <- gather(data.grouped, key = type_of_mutation, nr_mutated,
  p53,Wnt,"RTK-RAS",PI3K,TGFb,Notch,"Cell Cycle",
  factor_key=TRUE, na.rm = TRUE)

data.grouped.wide <- within(data.grouped.wide, {
  nr_mutated_perc <- (nr_mutated / n) * 100.0

  race <- ifelse(race == "his", "Hi", race)
  race <- ifelse(race == "cauc", "Ca", race)
  race <- ifelse(race == "as", "As", race)
  race <- ifelse(race == "af", "Af", race)
  race <- factor(race, levels = c("Ca", "Hi", "Af", "As"))
})
```

### 7.1 Number of mutations per pathway with predominant gene

```
data.mut <- data %>% filter(mutation.analysis)

data.plot <- data.frame(pathway = c("p53", "p53", "Wnt", "Wnt", "RTK-RAS", "RTK-RAS",
  "PI3K", "PI3K", "TGFb", "TGFb", "Notch", "Notch",
  "Cell Cycle", "Cell Cycle"),
  mutation = c("p53", "TP53", "Wnt", "APC", "RTK-RAS", "RAS/BRAF",
  "PI3K", "PIK3CA", "TGFb", "SMAD4", "Notch", "FBXW7",
  "Cell Cycle", "RB1"),
```

```

        nr_mutated = c(sum(data.mut$p53), sum(data.mut$tp53),
                      sum(data.mut$wnt), sum(data.mut$apc),
                      sum(data.mut$ras), sum(data.mut$rasbraf),
                      sum(data.mut$pi3k), sum(data.mut$pik3ca),
                      sum(data.mut$tgfb), sum(data.mut$smad4),
                      sum(data.mut$notch), sum(data.mut$fbxw7),
                      sum(data.mut$cell), sum(data.mut$rb1))) %>%
mutate(nr_mutated_perc = nr_mutated / sum(data.mut$mutation.analysis))

data.plot$mutation <- factor(data.plot$mutation,
                             levels = c("p53", "TP53", "Wnt", "APC", "RTK-RAS", "RAS/BRAF",
                                           "PI3K", "PIK3CA", "TGFb", "SMAD4", "Notch", "FBXW7",
                                           "Cell Cycle", "RB1"))

data.plot$pathway <- factor(data.plot$pathway,
                             levels = c("p53", "Wnt", "RTK-RAS",
                                           "PI3K", "TGFb", "Notch", "Cell Cycle"))

ggplot(data = data.plot, aes(x = mutation, y = nr_mutated,
                             fill = mutation)) +
  geom_bar(stat="identity", width = 0.75, position = position_dodge(width=1)) +
  facet_grid(~pathway, scales = "free_x", space = "free_x", switch = "x") +
  scale_fill_manual(values = rbind(pal_lancet()(7), pal_lancet(alpha = 0.5)(7))) +
  scale_y_continuous(breaks = seq(0, 100, 25), labels = paste(seq(0, 100, 25), "%", sep="")) +
  theme_pubr() +
  theme(strip.placement = "outside",
        axis.text.x = element_text(size = 12, angle = 45, hjust = 1),
        axis.title = element_blank()) +
  theme(strip.text.x = element_text(size = 12, color = "black"),
        strip.background = element_blank()) +
  theme(legend.position = "None")

```



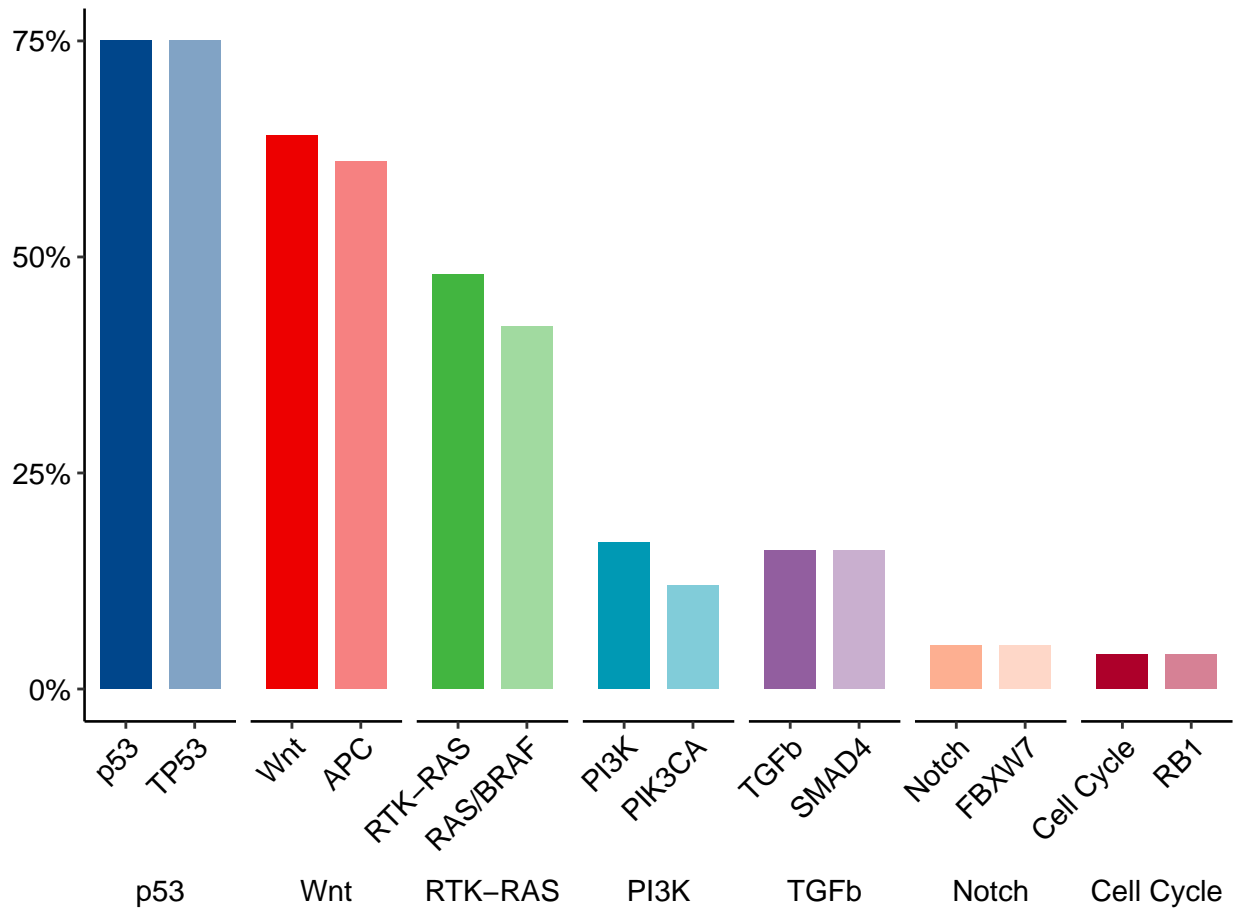

## 7.2 Number of mutations per pathway

```
data.plot <- data.grouped.wide %>%
  group_by(type_of_mutation) %>%
  summarise(
    n = n(),
    n_tot = sum(n_tot),
    nr_mutated = sum(nr_mutated)
  )
data.plot$nr_mutated_perc <- (data.plot$nr_mutated / data.plot$n_tot) * 100
ggplot(data = data.plot, aes(x = type_of_mutation, y = nr_mutated_perc,
                             fill = type_of_mutation)) +
  geom_bar(stat="identity", width = 0.75, position = position_dodge(width=1)) +
  scale_fill_lancet() +
  scale_y_continuous(breaks = seq(0, 100, 25), labels = paste(seq(0, 100, 25), "%", sep="")) +
  theme_pubr() +
  theme(strip.placement = "outside",
        axis.text.x = element_text(size = 12, angle = 45, hjust = 1),
        axis.title = element_blank()) +
  theme(strip.text.x = element_text(size = 12, color = "black"),
        strip.background = element_blank()) +
  theme(legend.position = "None")
```

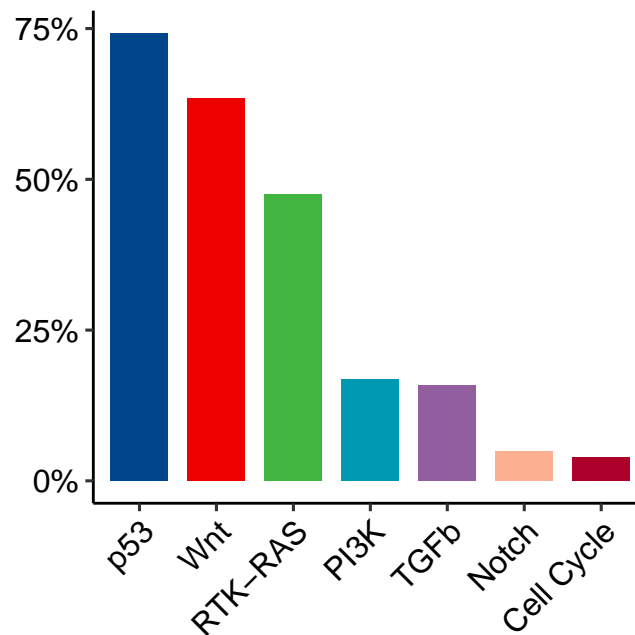

### 7.3 Frequency of mutations

```
ggplot(data = data, aes(x = num_altered_paths, fill = "num_altered_paths")) +  
  geom_histogram(stat="count") +  
  scale_fill_lancet() +  
  scale_y_continuous(breaks = seq(0, 50, 10), labels = paste(seq(0, 50, 10), "%", sep="")) +  
  scale_x_continuous(breaks = seq(0, 6, 1)) +  
  xlab("Nr of altered pathways") +  
  theme_pubr() +  
  theme(strip.placement = "outside",  
        axis.text.x = element_text(size = 12),  
        axis.title = element_blank()) +  
  theme(strip.text.x = element_text(size = 12, color = "black"),  
        strip.background = element_blank()) +  
  theme(legend.position = "None")
```

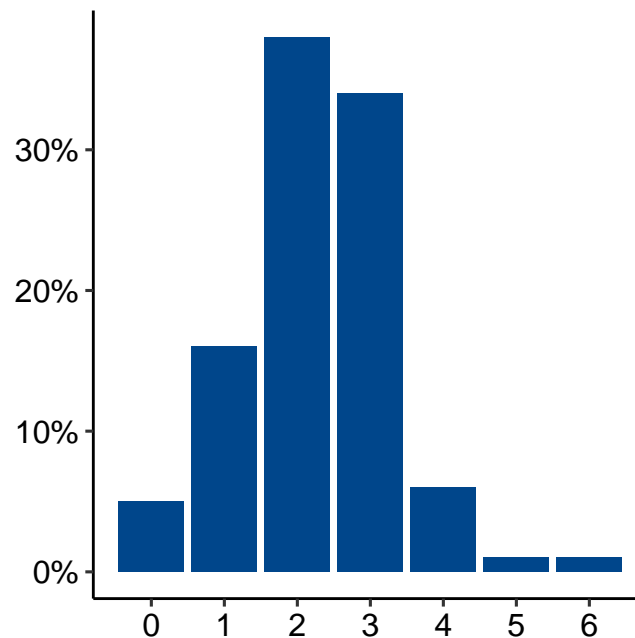

### 7.4 Mutation per race/ethnicity

```
data.grouped.wide <- data.grouped.wide %>% filter(!is.na(race))  
data.grouped.wide$race <- as.factor(data.grouped.wide$race)  
  
ggplot(data = data.grouped.wide, aes(x = race, y = nr_mutated_perc,  
                                     fill = type_of_mutation)) +  
  geom_bar(stat="identity", width = 0.75, position = position_dodge(width=1)) +  
  facet_grid(~type_of_mutation, scales = "free_x", space = "free_x", switch = "x") +  
  scale_fill_lancet() +  
  scale_y_continuous(breaks = seq(0, 100, 25), labels = paste(seq(0, 100, 25), "%", sep="")) +  
  theme_pubr() +
```

```

theme(strip.placement = "outside",
      axis.text.x = element_text(size = 10),
      axis.title = element_blank() +
theme(strip.text.x = element_text( size = 12, color = "black", face = "bold"),
      strip.background = element_blank()) +
theme(legend.position = "None")

```

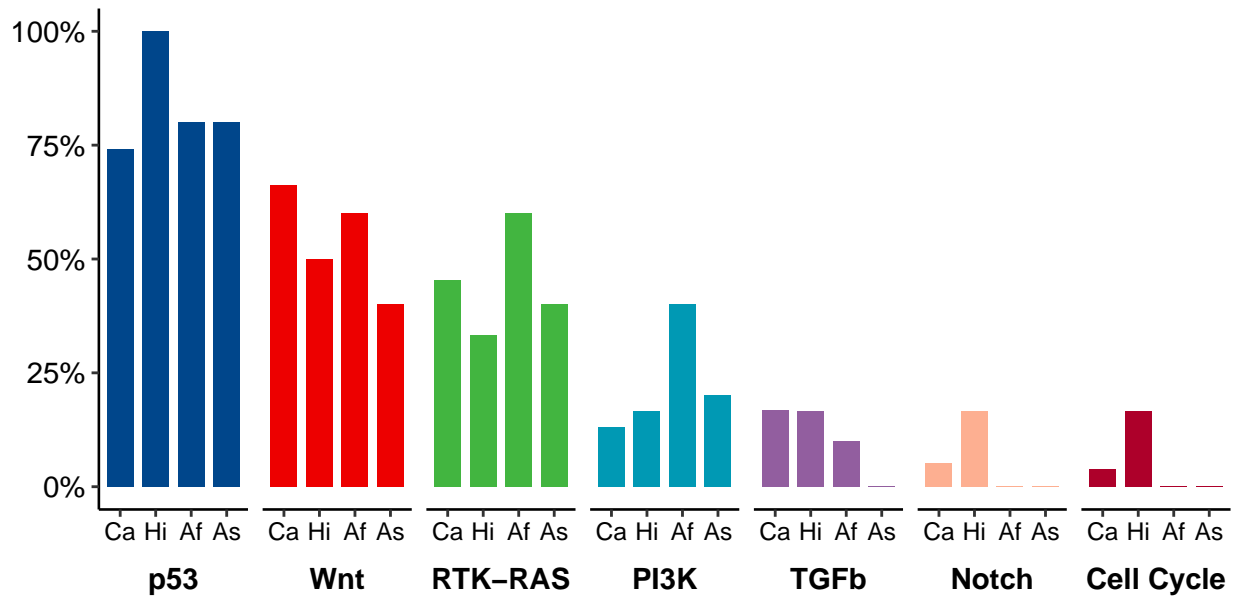

## 8 Citation

```
citation('ggplot2')
```

```
##  
## To cite ggplot2 in publications, please use:  
##  
## H. Wickham. ggplot2: Elegant Graphics for Data Analysis.  
## Springer-Verlag New York, 2016.  
##  
## A BibTeX entry for LaTeX users is  
##  
## @Book{,  
##   author = {Hadley Wickham},  
##   title = {ggplot2: Elegant Graphics for Data Analysis},  
##   publisher = {Springer-Verlag New York},  
##   year = {2016},  
##   isbn = {978-3-319-24277-4},  
##   url = {https://ggplot2.tidyverse.org},  
## }
```

```
citation('ggpubr')
```

```
##  
## To cite package 'ggpubr' in publications use:  
##  
## Alboukadel Kassambara (2020). ggpubr: 'ggplot2' Based Publication  
## Ready Plots. R package version 0.4.0.  
## https://CRAN.R-project.org/package=ggpubr  
##  
## A BibTeX entry for LaTeX users is  
##  
## @Manual{,  
##   title = {ggpubr: 'ggplot2' Based Publication Ready Plots},  
##   author = {Alboukadel Kassambara},  
##   year = {2020},  
##   note = {R package version 0.4.0},  
##   url = {https://CRAN.R-project.org/package=ggpubr},  
## }
```

```
citation('tidyverse')
```

```
##  
## Wickham et al., (2019). Welcome to the tidyverse. Journal of Open  
## Source Software, 4(43), 1686, https://doi.org/10.21105/joss.01686  
##  
## A BibTeX entry for LaTeX users is  
##  
## @Article{,  
##   title = {Welcome to the {tidyverse}},  
##   author = {Hadley Wickham and Mara Averick and Jennifer Bryan and Winston Chang and Lucy D'Agostini
```

```
##   year = {2019},
##   journal = {Journal of Open Source Software},
##   volume = {4},
##   number = {43},
##   pages = {1686},
##   doi = {10.21105/joss.01686},
## }
```

```
citation()
```

```
##
## To cite R in publications use:
##
##   R Core Team (2021). R: A language and environment for statistical
##   computing. R Foundation for Statistical Computing, Vienna, Austria.
##   URL https://www.R-project.org/.
##
## A BibTeX entry for LaTeX users is
##
##   @Manual{,
##     title = {R: A Language and Environment for Statistical Computing},
##     author = {{R Core Team}},
##     organization = {R Foundation for Statistical Computing},
##     address = {Vienna, Austria},
##     year = {2021},
##     url = {https://www.R-project.org/},
##   }
##
## We have invested a lot of time and effort in creating R, please cite it
## when using it for data analysis. See also 'citation("pkgname")' for
## citing R packages.
```
